# Supplementary material for: Epiphytic Bacteria Are Essential for the Production and Transformation of Algae-Derived Carboxyl-Rich Alicyclic Molecule (CRAM)-like DOM
Source: PubMed Central journal article supplement (PMC8528127; doi:10.1128/spectrum.01531-21), 2021-10-20
Supplement: spectrum01531-21_supp_1_seq4.pdf [file spectrum01531-21_supp_1_seq4.pdf]

**Journal: *Microbiology Spectrum***

Supplementary information for

**Epiphytic bacteria are essential for the production and  
transformation of algae-derived carboxyl-rich alicyclic molecules  
(CRAM)-like DOM**

Yang Liu<sup>1,2</sup>, Jinjun Kan<sup>3\*</sup>, Chen He<sup>4</sup>, Quan Shi<sup>4</sup>, Yan-Xia Liu<sup>5</sup>, Zhen-Chuan Fan<sup>5</sup>, Jun

Sun<sup>2\*</sup>

<sup>1</sup> Institute of Marine Science and Technology, Shandong University, Qingdao,  
Shandong 266237, China.

<sup>2</sup> College of Marine Science and Technology, China University of Geosciences  
(Wuhan), Wuhan, Hubei 430074, China.

<sup>3</sup> Stroud Water Research Center, 970 Spencer Road, Avondale, PA 19311, USA.

<sup>4</sup> State Key Laboratory of Heavy Oil Processing, China University of Petroleum,  
Beijing 102249, China.

<sup>5</sup> State Key Laboratory of Food Nutrition and Safety, Institute of Health  
Biotechnology, Tianjin University of Science and Technology, Tianjin 300457, China.

Corresponding e-mail: [jkan@stroudcenter.org](mailto:jkan@stroudcenter.org) and [phytoplankton@163.com](mailto:phytoplankton@163.com)

**Contents of this file:**

- **Figures: 4**
- **Tables: 3**
- **References: 4**

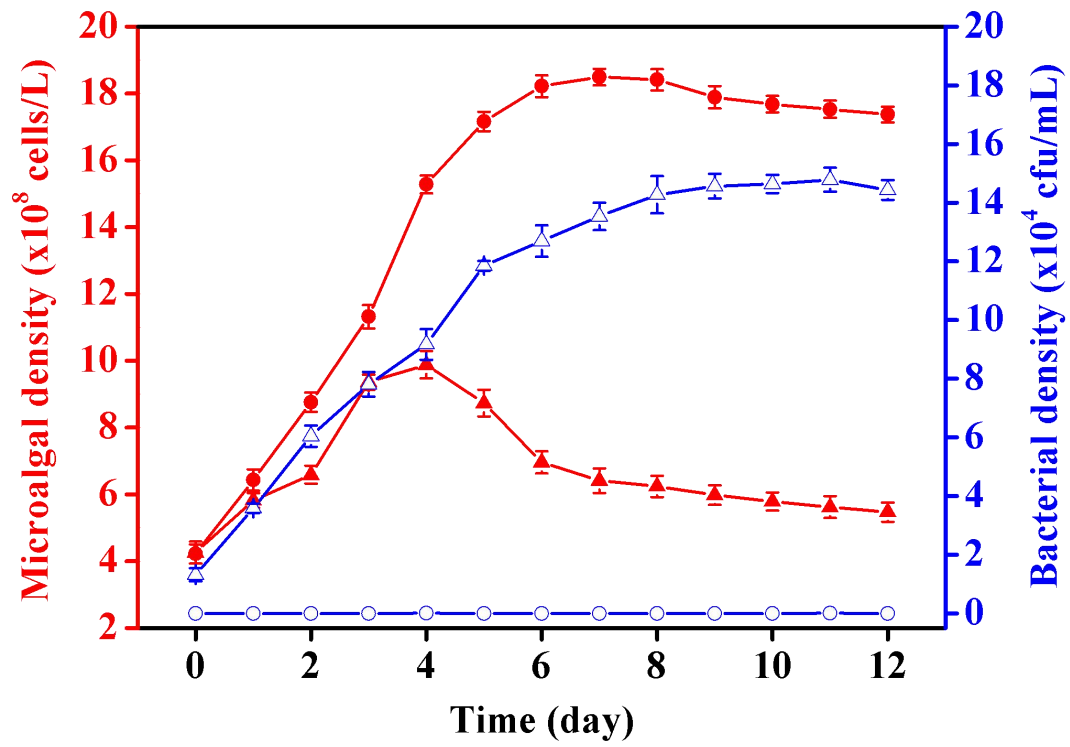

**Fig. S1** Growth curves for *S. dohrnii* cultures (red) and bacteria (blue). ○, with antibiotics; △, without antibiotics.

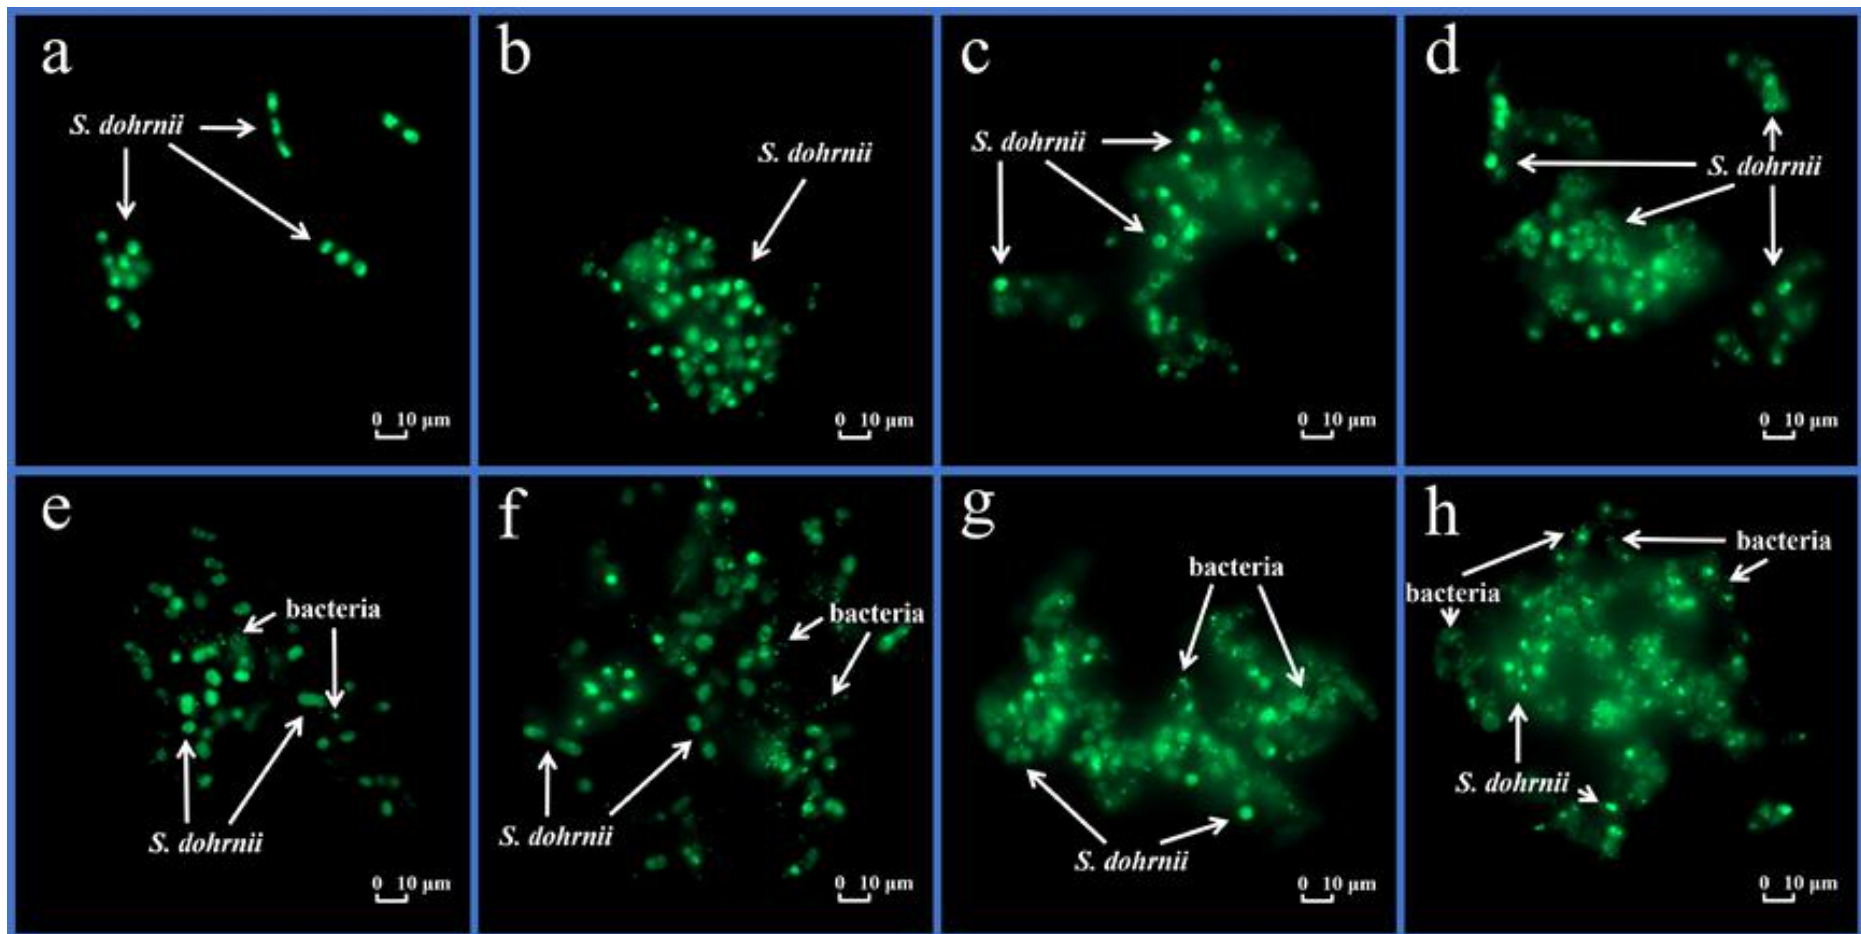

**Fig. S2** Fluorescence photographs of *S. dohrnii* and bacteria at different growth phases with (a-d) and without antibiotics (e-h). a-d and e-h represented initial, exponential, stationary and degradation respectively.

a

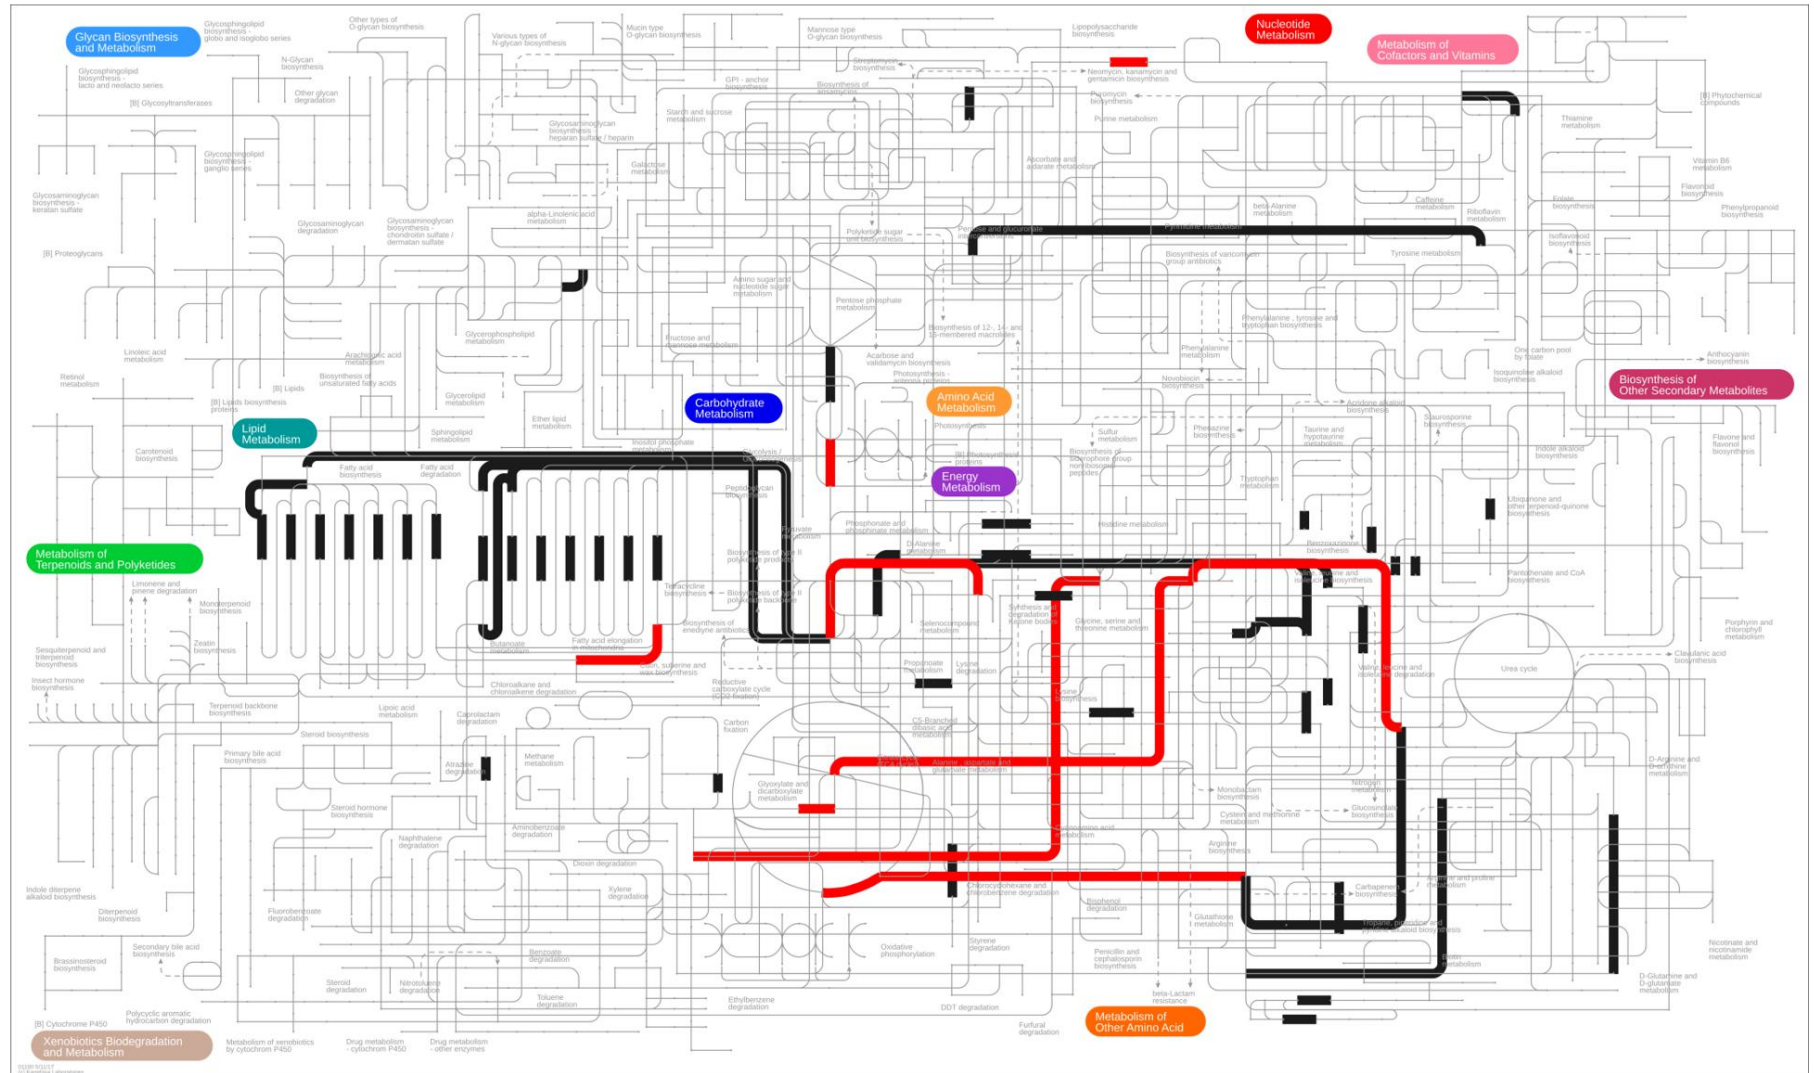

b

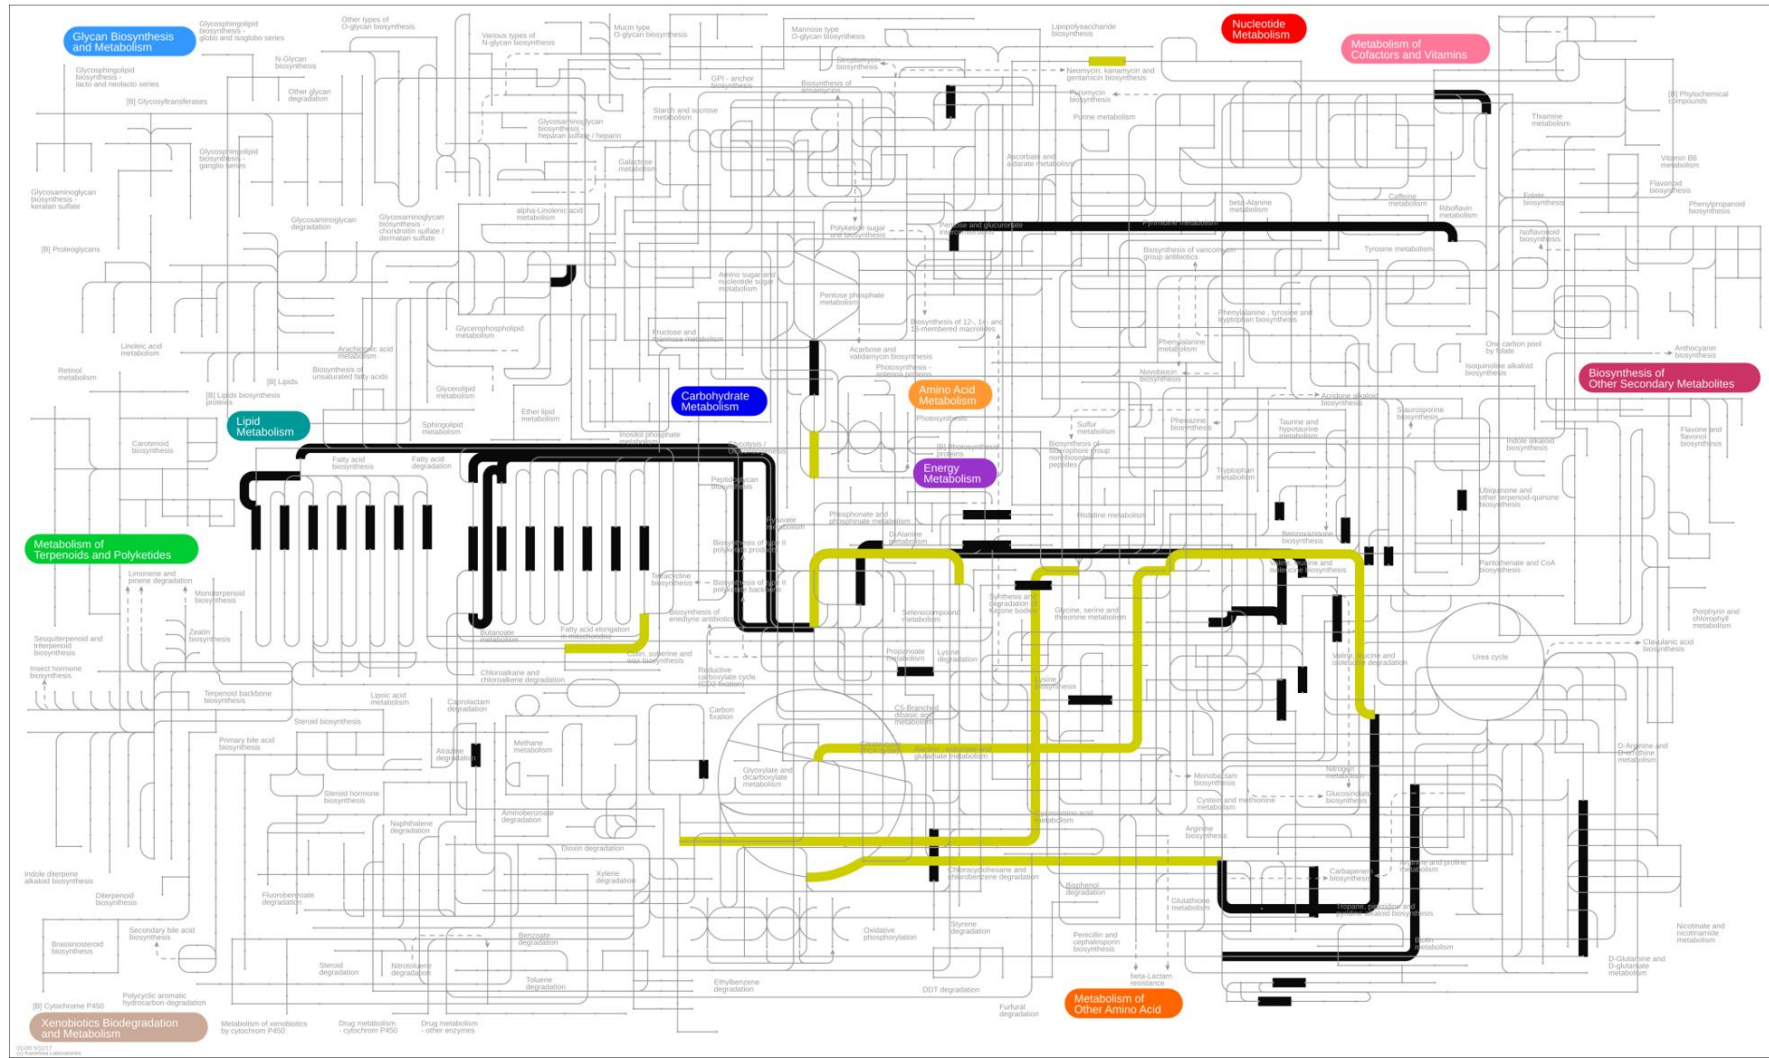

C

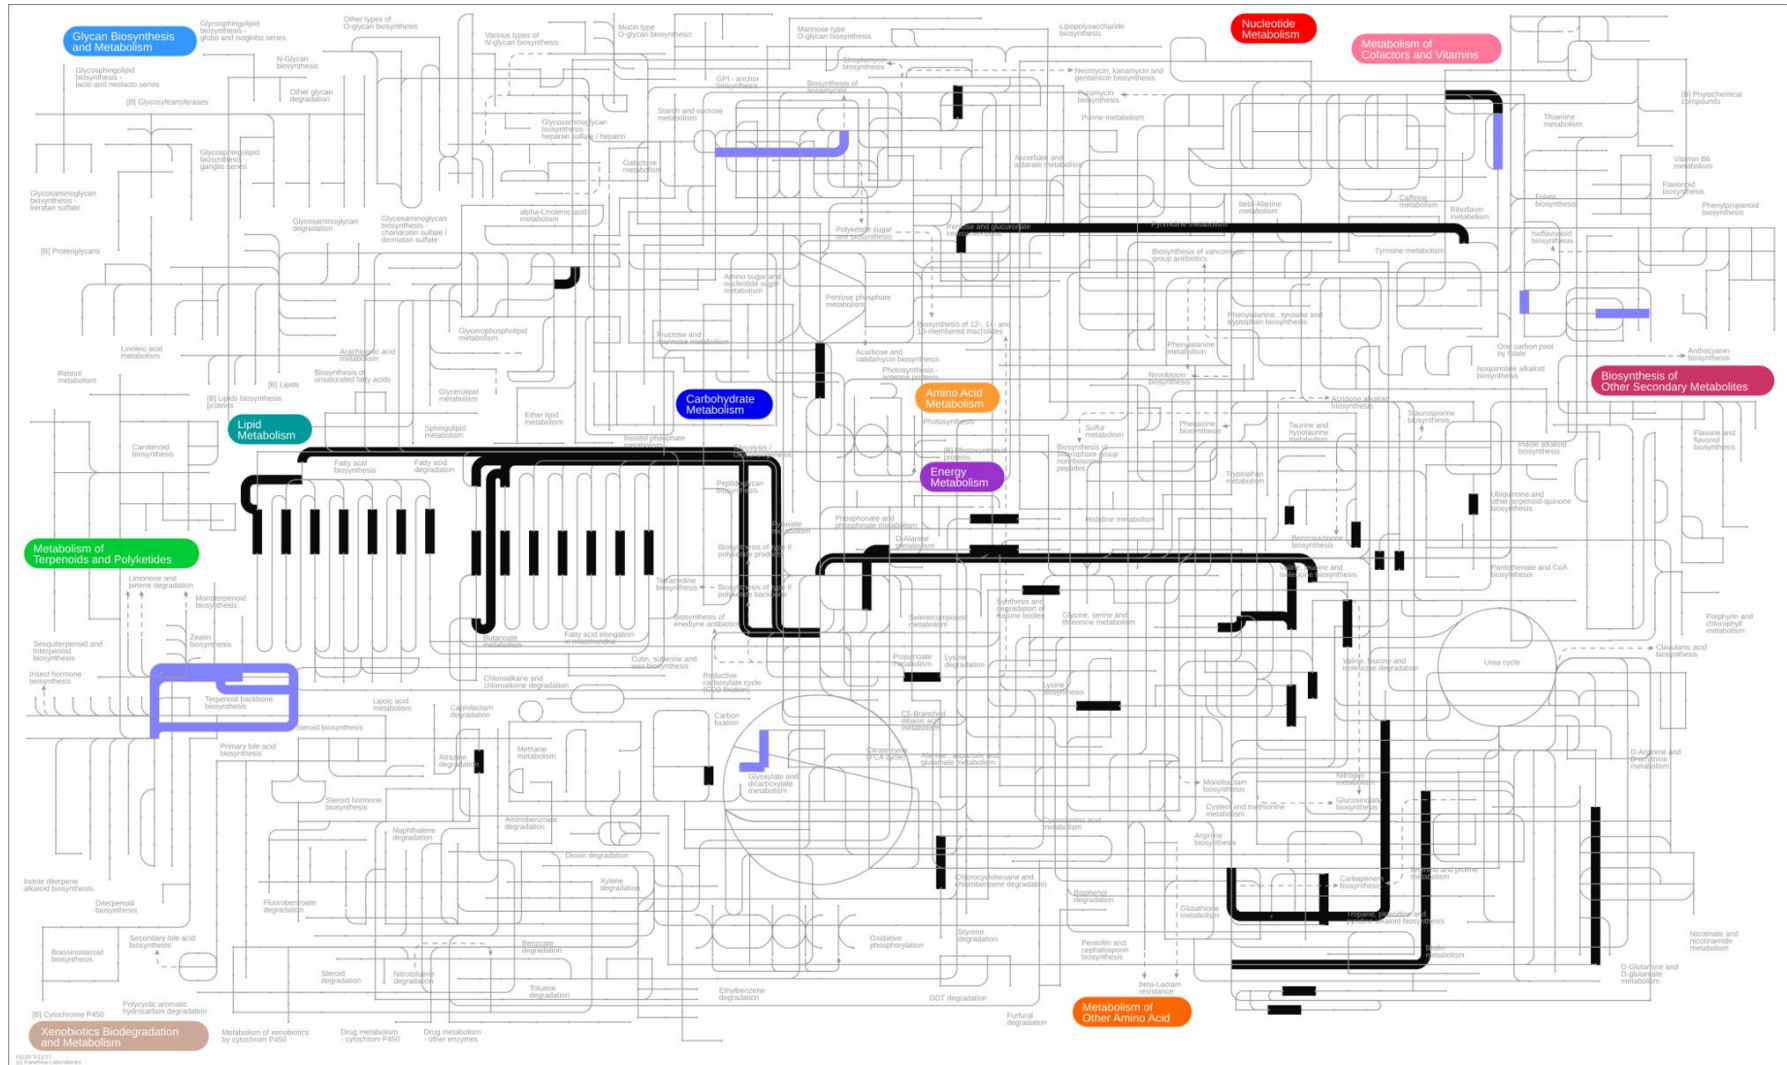

d

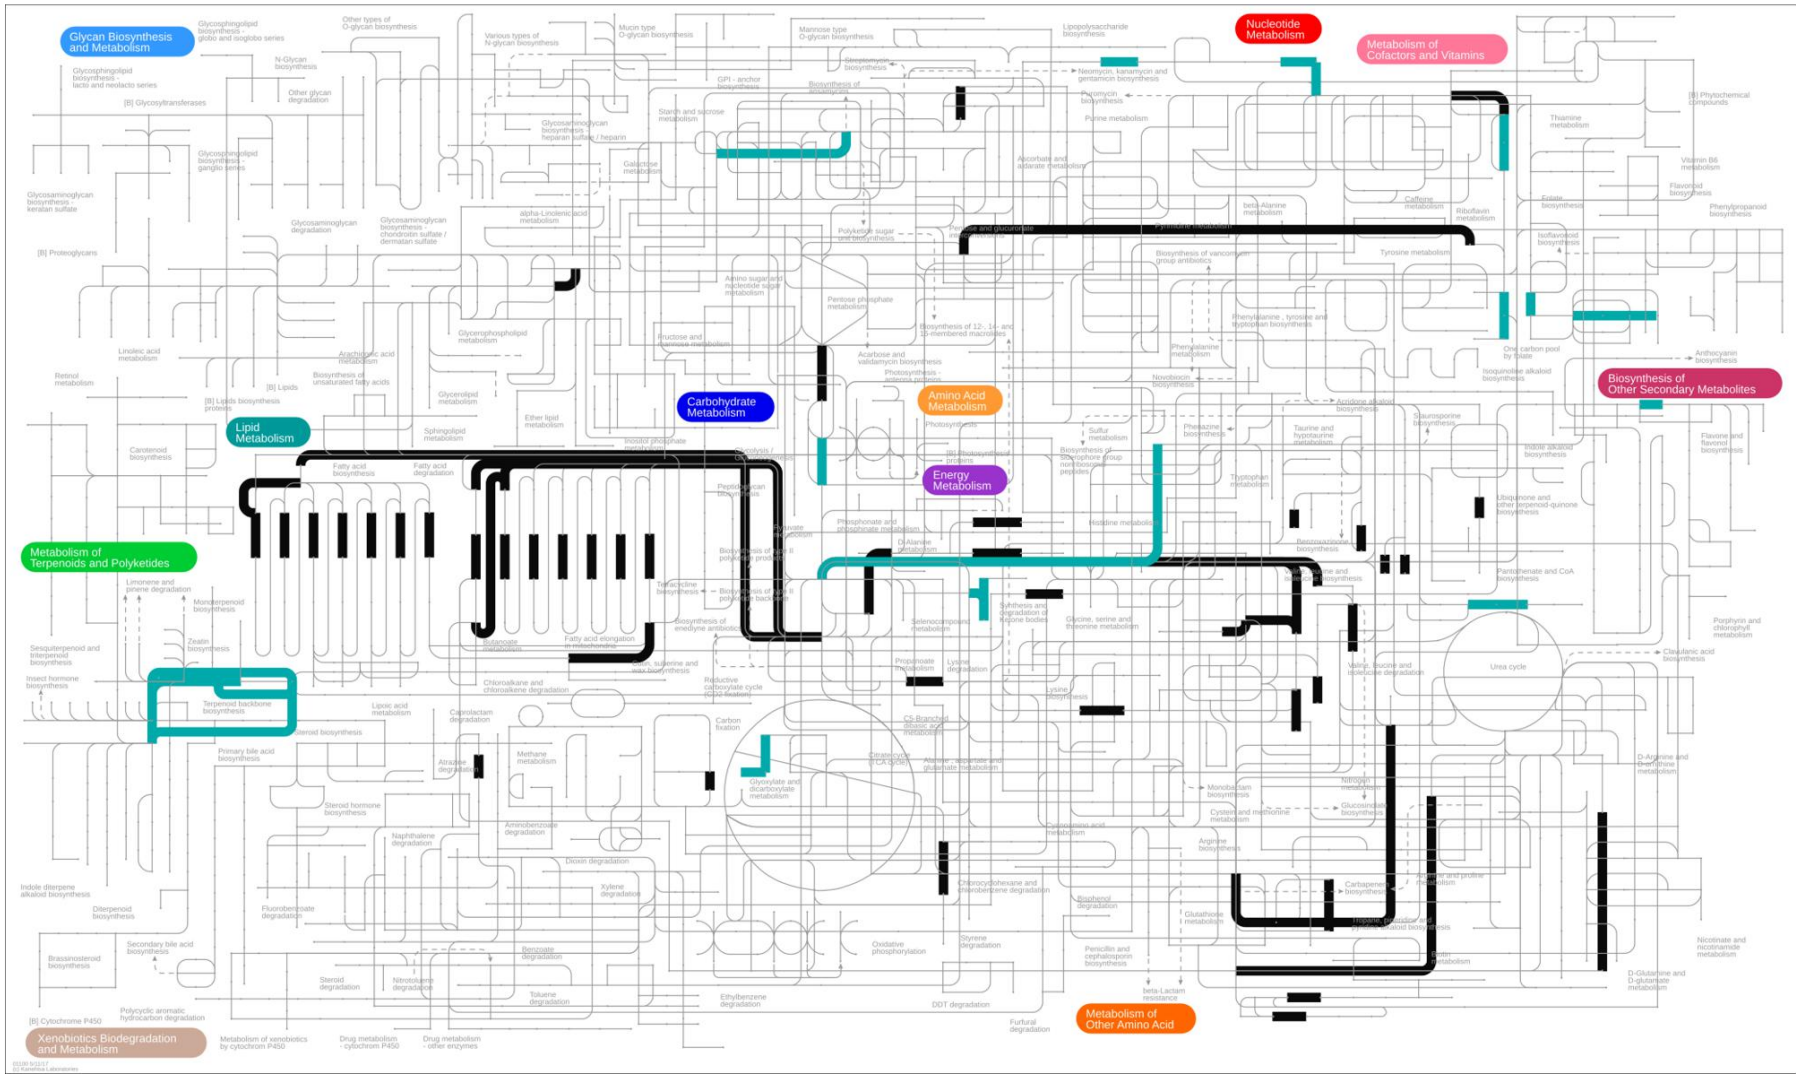

**Fig. S3** Predicted metabolic pathway of associated bacterial communities ( $\log_2$  RPKM values greater than 15) at different algal growth phases (a-d represented initial, exponential, stationary and degradation, respectively). Pathways were generated using the iPath 3.0 (1) based on KEGG annotation of genes detected from sequencing. RPKM, read number per kb of each coding sequence, per million mapped sequences. The colors black represents the common metabolic pathway, while red, yellow, purple and green represent the unique metabolic pathways at different growth phases.



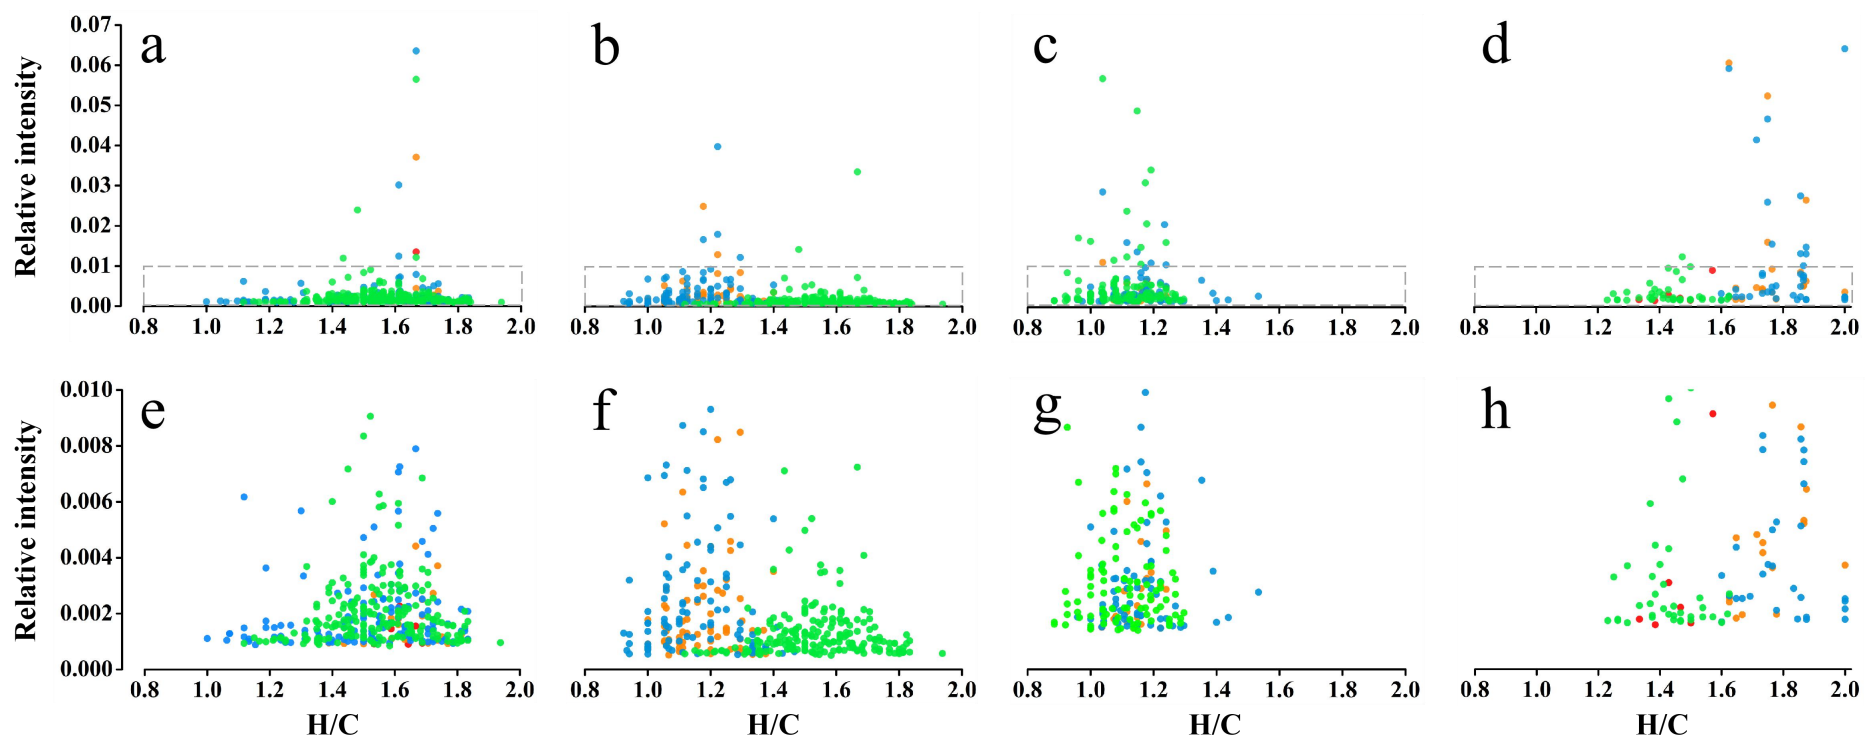

Fig. S4 Relative intensity and distribution of nitrogen and sulfur-containing DOM compounds at different growth phases (●, initial; ●, exponential; ●, stationary; ●, degradation). a, formulas with one nitrogen atom (N=1); b, formulas with two nitrogen atoms (N=2); c, formulas with three nitrogen atom (N=3); d, formulas with one sulfur atom (S=1). Enlarged images of a-d (gray dotted box) were shown in e-h, respectively.

**Table S1.** Orthogonal testing for combinations of antibiotics used in the experiment

| Antibiotics concentration (mg/L) | 0   | 50         | 100        | 200               | 400        |
|----------------------------------|-----|------------|------------|-------------------|------------|
| Antibiotics selection            |     | a, (×)     | a, (×)     | a, (×)            | a, (×)     |
|                                  |     | b, (×)     | b, (×)     | b, (×)            | b, (×)     |
|                                  |     | c, (×)     | c, (×)     | c, (×)            | c, (×)     |
|                                  | (×) | a+b, (×)   | a+b, (×)   | a+b, (×)          | a+b, (×)   |
|                                  |     | b+c, (×)   | b+c, (×)   | b+c, (×)          | b+c, (×)   |
|                                  |     | a+c, (×)   | a+c, (×)   | a+c, (×)          | a+c, (×)   |
|                                  |     | a+b+c, (×) | a+b+c, (×) | <b>a+b+c, (√)</b> | a+b+c, (√) |

**a**, penicillin; **b**, chloramphenicol; **c**, kanamycin sulfate; **×**, bacteria detected; and **√**, no bacteria.

**Table S2.** Peaks of EEMs fluorescence attributed to different sources of organic matter

| Peak                            | Excitation wavelength<br>(Ex, nm) | Emission wavelength<br>(Em, nm) | Description  | Comparison with previous studies                                    |
|---------------------------------|-----------------------------------|---------------------------------|--------------|---------------------------------------------------------------------|
| A                               | 230-260                           | 380-460                         | Humic-like   | Terrestrial and marine humic-like, Peak A, Ex/Em: 235/404, (2)      |
| M                               | 290-310                           | 370-420                         | Humic-like   | Microbial processing of organic matter, Peak M, Ex/Em: 310/414, (3) |
| T <sub>1</sub> , T <sub>2</sub> | 225, 275                          | 330-340                         | Protein-like | Tryptophan-like, Peak T, Ex/Em:: 225(275)/340, (4)                  |

**Table S3.** Top 15 bacterial indicator ASVs at different growth phases in the *S. dohrnii* cultures

| <b>Growth phases</b> | <b>ASV_ID</b> | <b>Phylum</b>  | <b>Class</b>        | <b>order</b>    | <b>family</b>    | <b>genus</b>  | <b>species</b>      | <b>Indicator value index</b> | <b>P value</b> |
|----------------------|---------------|----------------|---------------------|-----------------|------------------|---------------|---------------------|------------------------------|----------------|
| Initial              | ASV_2         | Proteobacteria | Gammaproteobacteria | Alteromonadales | Alteromonadaceae | /             | /                   | 0.171                        | 0.003          |
| Initial              | ASV_6         | Proteobacteria | Alphaproteobacteria | Rhodobacterales | Rhodobacteraceae | /             | /                   | 0.223                        | 0.007          |
| Initial              | ASV_34        | Proteobacteria | Alphaproteobacteria | Rhodobacterales | Rhodobacteraceae | /             | /                   | 0.165                        | 0.018          |
| Initial              | ASV_42        | Firmicutes     | Bacilli             | Bacillales      | Bacillaceae      | Bacillus      | Bacillus_sp_M71_S33 | 0.144                        | 0.004          |
| Initial              | ASV_100       | Proteobacteria | Alphaproteobacteria | Rhodobacterales | Rhodobacteraceae | /             | /                   | 0.162                        | 0.017          |
| Initial              | ASV_244       | Proteobacteria | Alphaproteobacteria | Rhodobacterales | Rhodobacteraceae | Sulfitobacter | /                   | 0.165                        | 0.004          |
| Initial              | ASV_311       | Proteobacteria | Alphaproteobacteria | Rhodobacterales | Rhodobacteraceae | /             | /                   | 0.185                        | 0.029          |
| Initial              | ASV_315       | Proteobacteria | Alphaproteobacteria | Rhodobacterales | Rhodobacteraceae | /             | /                   | 0.166                        | 0.023          |
| Initial              | ASV_327       | Proteobacteria | Alphaproteobacteria | Rhodobacterales | Rhodobacteraceae | /             | /                   | 0.181                        | 0.027          |
| Initial              | ASV_340       | Proteobacteria | Alphaproteobacteria | Rhodobacterales | Rhodobacteraceae | /             | /                   | 0.135                        | 0.004          |
| Initial              | ASV_368       | Proteobacteria | Gammaproteobacteria | Alteromonadales | Alteromonadaceae | Marinobacter  | /                   | 0.345                        | 0.002          |
| Initial              | ASV_375       | Proteobacteria | Alphaproteobacteria | Rhodobacterales | Rhodobacteraceae | Marivita      | /                   | 0.217                        | 0.039          |
| Initial              | ASV_393       | Proteobacteria | Alphaproteobacteria | Rhodobacterales | Rhodobacteraceae | /             | /                   | 0.215                        | 0.035          |
| Initial              | ASV_398       | Proteobacteria | Alphaproteobacteria | Rhodobacterales | Rhodobacteraceae | /             | /                   | 0.294                        | 0.007          |
| Initial              | ASV_427       | Proteobacteria | Alphaproteobacteria | Rhodobacterales | Rhodobacteraceae | /             | /                   | 0.343                        | 0.007          |
| Exponential          | ASV_6         | Proteobacteria | Alphaproteobacteria | Rhodobacterales | Rhodobacteraceae | /             | /                   | 0.163                        | 0.007          |
| Exponential          | ASV_34        | Proteobacteria | Alphaproteobacteria | Rhodobacterales | Rhodobacteraceae | /             | /                   | 0.164                        | 0.018          |
| Exponential          | ASV_100       | Proteobacteria | Alphaproteobacteria | Rhodobacterales | Rhodobacteraceae | /             | /                   | 0.191                        | 0.017          |
| Exponential          | ASV_311       | Proteobacteria | Alphaproteobacteria | Rhodobacterales | Rhodobacteraceae | /             | /                   | 0.177                        | 0.029          |
| Exponential          | ASV_315       | Proteobacteria | Alphaproteobacteria | Rhodobacterales | Rhodobacteraceae | /             | /                   | 0.175                        | 0.023          |
| Exponential          | ASV_327       | Proteobacteria | Alphaproteobacteria | Rhodobacterales | Rhodobacteraceae | /             | /                   | 0.165                        | 0.027          |

|             |         |                |                     |                  |                    |                                  |                                    |       |       |
|-------------|---------|----------------|---------------------|------------------|--------------------|----------------------------------|------------------------------------|-------|-------|
| Exponential | OUT_337 | Proteobacteria | Gammaproteobacteria | Alteromonadales  | Alteromonadaceae   | Marinobacter                     | /                                  | 0.109 | 0.007 |
| Exponential | ASV_340 | Proteobacteria | Alphaproteobacteria | Rhodobacterales  | Rhodobacteraceae   | /                                | /                                  | 0.135 | 0.004 |
| Exponential | ASV_356 | Proteobacteria | Alphaproteobacteria | /                | /                  | /                                | /                                  | 0.105 | 0.003 |
| Exponential | ASV_366 | Bacteroidetes  | Flavobacteriia      | Flavobacteriales | Flavobacteriaceae  | Aquibacter                       | /                                  | 0.155 | 0.044 |
| Exponential | ASV_380 | Proteobacteria | Alphaproteobacteria | Rhodobacterales  | Rhodobacteraceae   | /                                | /                                  | 0.234 | 0.045 |
| Exponential | OUT_389 | Proteobacteria | Alphaproteobacteria | Rhodobacterales  | Rhodobacteraceae   | /                                | /                                  | 0.126 | 0.009 |
| Exponential | ASV_393 | Proteobacteria | Alphaproteobacteria | Rhodobacterales  | Rhodobacteraceae   | /                                | /                                  | 0.169 | 0.035 |
| Exponential | ASV_398 | Proteobacteria | Alphaproteobacteria | Rhodobacterales  | Rhodobacteraceae   | /                                | /                                  | 0.171 | 0.007 |
| Exponential | ASV_427 | Proteobacteria | Alphaproteobacteria | Rhodobacterales  | Rhodobacteraceae   | /                                | /                                  | 0.231 | 0.007 |
| Stationary  | OUT_3   | Bacteroidetes  | Flavobacteriia      | Flavobacteriales | Flavobacteriaceae  | Aquibacter                       | /                                  | 0.096 | 0.015 |
| Stationary  | ASV_4   | Bacteroidetes  | Flavobacteriia      | Flavobacteriales | Cryomorphaceae     | Fluviicola                       | /                                  | 0.114 | 0.018 |
| Stationary  | ASV_21  | Proteobacteria | Alphaproteobacteria | Caulobacterales  | Hyphomonadaceae    | Maricaulis                       | /                                  | 0.107 | 0.003 |
| Stationary  | ASV_72  | Proteobacteria | Gammaproteobacteria | Cellvibrionales  | Spongiibacteraceae | Spongiibacter                    | Ambiguous_taxa                     | 0.151 | 0.001 |
| Stationary  | ASV_100 | Proteobacteria | Alphaproteobacteria | Rhodobacterales  | Rhodobacteraceae   | /                                | /                                  | 0.126 | 0.017 |
| Stationary  | ASV_308 | Proteobacteria | Alphaproteobacteria | /                | /                  | /                                | /                                  | 0.121 | 0.012 |
| Stationary  | ASV_316 | Bacteroidetes  | Flavobacteriia      | Flavobacteriales | Cryomorphaceae     | Fluviicola                       | /                                  | 0.121 | 0.020 |
| Stationary  | ASV_327 | Proteobacteria | Alphaproteobacteria | Rhodobacterales  | Rhodobacteraceae   | /                                | /                                  | 0.102 | 0.027 |
| Stationary  | ASV_330 | Bacteroidetes  | Flavobacteriia      | Flavobacteriales | Flavobacteriaceae  | Aquibacter                       | /                                  | 0.113 | 0.014 |
| Stationary  | ASV_337 | Proteobacteria | Gammaproteobacteria | Alteromonadales  | Alteromonadaceae   | Marinobacter                     | /                                  | 0.120 | 0.007 |
| Stationary  | ASV_340 | Proteobacteria | Alphaproteobacteria | Rhodobacterales  | Rhodobacteraceae   | /                                | /                                  | 0.117 | 0.004 |
| Stationary  | ASV_344 | Proteobacteria | Alphaproteobacteria | Rhodobacterales  | Rhodobacteraceae   | Marinovum                        | alpha_proteobacterium_GM<br>D21D01 | 0.121 | 0.041 |
| Stationary  | ASV_360 | Proteobacteria | Alphaproteobacteria | /                | /                  | /                                | /                                  | 0.129 | 0.023 |
| Stationary  | ASV_389 | Proteobacteria | Alphaproteobacteria | Rhodobacterales  | Rhodobacteraceae   | /                                | /                                  | 0.106 | 0.009 |
| Stationary  | OUT_423 | Proteobacteria | Alphaproteobacteria | OCS116_clade     | Unknown_Family     | Candidatus_Pha<br>comarinobacter | uncultured_bacterium               | 0.093 | 0.004 |

|             |         |                |                     |                   |                     |                              |                                        |       |       |
|-------------|---------|----------------|---------------------|-------------------|---------------------|------------------------------|----------------------------------------|-------|-------|
| Degradation | ASV_2   | Proteobacteria | Gammaproteobacteria | Alteromonadales   | Alteromonadaceae    | /                            | /                                      | 0.438 | 0.003 |
| Degradation | ASV_7   | Firmicutes     | Bacilli             | Bacillales        | Bacillaceae         | Bacillus                     | /                                      | 0.207 | 0.001 |
| Degradation | ASV_8   | Proteobacteria | Betaproteobacteria  | Burkholderiales   | Burkholderiaceae    | Limnobacter                  | uncultured_beta_proteobacterium        | 0.376 | 0.043 |
| Degradation | ASV_10  | Proteobacteria | Alphaproteobacteria | OCS116_clade      | Unknown_Family      | Candidatus_Phaeomarinobacter | Candidatus_Phaeomarinobacter_ectocarpi | 0.173 | 0.003 |
| Degradation | ASV_20  | Proteobacteria | Gammaproteobacteria | Xanthomonadales   | Solimonadaceae      | /                            | /                                      | 0.919 | 0.002 |
| Degradation | ASV_22  | Proteobacteria | Gammaproteobacteria | Oceanospirillales | Alcanivoracaceae    | Alcanivorax                  | uncultured_Alcanivorax_sp.             | 0.430 | 0.003 |
| Degradation | ASV_37  | Proteobacteria | Gammaproteobacteria | Thiotrichales     | Piscirickettsiaceae | Methylophaga                 | Ambiguous_taxa                         | 0.377 | 0.005 |
| Degradation | ASV_83  | Proteobacteria | Gammaproteobacteria | Oceanospirillales | Oceanospirillaceae  | Pseudospirillum              | Ambiguous_taxa                         | 1.000 | 0.004 |
| Degradation | ASV_331 | Proteobacteria | Alphaproteobacteria | OCS116_clade      | Unknown_Family      | Candidatus_Phaeomarinobacter | /                                      | 0.298 | 0.003 |
| Degradation | ASV_333 | Bacteroidetes  | Flavobacteriia      | Flavobacteriales  | Flavobacteriaceae   | Aquibacter                   | /                                      | 0.229 | 0.033 |
| Degradation | ASV_361 | Proteobacteria | Alphaproteobacteria | OCS116_clade      | Unknown_Family      | Candidatus_Phaeomarinobacter | Candidatus_Phaeomarinobacter_ectocarpi | 0.262 | 0.016 |
| Degradation | ASV_375 | Proteobacteria | Alphaproteobacteria | Rhodobacterales   | Rhodobacteraceae    | Marivita                     | /                                      | 0.391 | 0.039 |
| Degradation | ASV_379 | Proteobacteria | Gammaproteobacteria | Alteromonadales   | Alteromonadaceae    | Marinobacter                 | /                                      | 0.274 | 0.003 |
| Degradation | ASV_407 | Proteobacteria | Alphaproteobacteria | OCS116_clade      | Unknown_Family      | Candidatus_Phaeomarinobacter | Candidatus_Phaeomarinobacter_ectocarpi | 0.440 | 0.015 |
| Degradation | ASV_417 | Proteobacteria | Gammaproteobacteria | Xanthomonadales   | Solimonadaceae      | /                            | /                                      | 0.857 | 0.002 |

## References

1. Darzi Y, Letunic I, Bork P, Yamada T. 2018. iPath3. 0: interactive pathways explorer v3. *Nucleic Acids Res.* **46**: 510-513. <https://doi.org/10.1093/nar/gky299>.
2. Yao X, Zhang Y, Zhu G, Qin B, Feng L, Cai L, Gao G. 2011. Resolving the variability of CDOM fluorescence to differentiate the sources and fate of DOM in Lake Taihu and its tributaries. *Chemosphere*, **82**: 2, 145-155. <https://doi.org/10.1016/j.chemosphere.2010.10.049>.
3. Murphy, K.R., Stedmon, C.A., Waite, T.D., Ruiz, G.M., 2008. Distinguishing between terrestrial and autochthonous organic matter sources in marine environments using fluorescence spectroscopy. *Mar. Chem.* **108**: 40-58. <https://doi.org/10.1016/j.marchem.2007.10.003>.
4. Coble PG, Del Castillo, CE, Avril, B. 1998. Distribution and optical properties of CDOM in the Arabian Sea during the 1995 Southwest Monsoon. *Deep Sea Res. Part II* **45**: 2195-2223. [https://doi.org/10.1016/S0967-0645\(98\)00068-X](https://doi.org/10.1016/S0967-0645(98)00068-X).
